# Supplementary material
Source: PubMed Central journal article supplement (PMC2078145)
Supplement: oenvmed_63_3_173__1.pdf [file oenvmed_63_3_173__1.pdf]

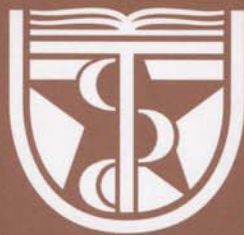

THE UNIVERSITY *of* TEXAS

---

HEALTH SCIENCE CENTER AT HOUSTON

SCHOOL OF PUBLIC HEALTH

**A Survey of Asthma in  
Health Professionals**

A study funded by the U.S. Centers for Disease Control and Prevention  
and the National Institute for Occupational Safety and Health  
(CDC/NIOSH)

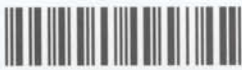

# A Survey of Asthma In Health Professionals

You have been randomly selected from among your licensed Texas colleagues. All answers are confidential.

**START HERE**

## Trouble Breathing

Questions 1 and 2 ask you about trouble breathing *EVER IN YOUR LIFE*.

1. Have you ever had trouble with your breathing?  
(Mark an X for the single best answer)

- Yes  
 No → Go to Question 2  
 Don't Know → Go to Question 2

1.1 If YES, what kind of trouble did you have?

- Continuously, as if breathing is not quite right  
 Repeatedly, however gets completely better  
 Only rarely

1.2 If YES, was this trouble with your breathing brought on by your work environment?

- Yes  
 No  
 Don't Know

2. Have you ever had asthma? (Mark an X for the single best answer)

- Yes  
 No → Go to Question 5 on Page 3  
 Don't Know → Go to Question 5 on Page 3

2.1 If YES, has your asthma been confirmed by a doctor?

- Yes  
 No → Go to Question 3  
 Don't Know → Go to Question 3

2.1.1 If YES, at what age was your asthma confirmed by a doctor?

YEARS OLD

For Office use Only

|  |  |  |  |  |  |  |  |  |  |
|--|--|--|--|--|--|--|--|--|--|
|  |  |  |  |  |  |  |  |  |  |
|--|--|--|--|--|--|--|--|--|--|

For Office use Only

|  |  |  |  |  |  |  |  |  |  |
|--|--|--|--|--|--|--|--|--|--|
|  |  |  |  |  |  |  |  |  |  |
|--|--|--|--|--|--|--|--|--|--|

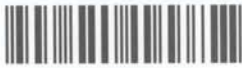

## Asthma

Questions 3 and 4 ask you about asthma in THE LAST 12 MONTHS.

3. Have you had an attack/episode of asthma in the last 12 months?  
(Mark an X for the single best answer)

- Yes
- No → Go to Question 4
- Don't Know → Go to Question 4

3.1 If YES, how many attacks of asthma have you had in the last 12 months? (Enter approximate number of asthma attacks)

|  |  |  |
|--|--|--|
|  |  |  |
|--|--|--|

 ATTACKS

3.2 Have you had an attack/episode of asthma while you were at work in the last 12 months?

- Yes
- No → Go to Question 3.3
- Don't Know → Go to Question 3.3

3.2.1 If YES, do you know what triggered the last attack/episode of asthma while you were at work?

- Yes
- No → Go to Question 3.3

3.2.1.a If YES, what was the trigger?

|  |  |  |  |  |  |  |  |  |  |  |  |  |  |  |  |  |  |  |  |
|--|--|--|--|--|--|--|--|--|--|--|--|--|--|--|--|--|--|--|--|
|  |  |  |  |  |  |  |  |  |  |  |  |  |  |  |  |  |  |  |  |
|--|--|--|--|--|--|--|--|--|--|--|--|--|--|--|--|--|--|--|--|

3.3 Have you had to miss any days of work due to asthma in the last 12 months?

- Yes
- No → Go to Question 4
- Don't Know → Go to Question 4

3.3.1 If YES, how many days of work did you have to miss due to asthma? (Enter approximate number of days)

|  |  |  |
|--|--|--|
|  |  |  |
|--|--|--|

 DAYS

4. Are you currently taking any medications for asthma, including inhalers, aerosols or tablets?

- Yes
- No

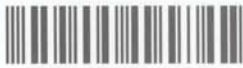

## Wheezing, Whistling or Shortness of Breath

Questions 5 to 7 ask you to think about your breathing in THE LAST 12 MONTHS.

5. Have you had wheezing or whistling in your chest at any time in the last 12 months? (Mark an X for the single best answer)

- Yes
- No → Go to Question 6 on Page 4
- Don't Know → Go to Question 6 on Page 4

5.1 If YES, Have you had wheezing or whistling in your chest when you did not have a cold in the last 12 months?

- Yes
- No

5.2 Have you had wheezing or whistling in your chest while you were at home (indoors or outdoors) at any time in the last 12 months?

- Yes
- No

5.3 Have you had wheezing or whistling in your chest while you were at work at any time in the last 12 months?

- Yes
- No

5.4 While you were away from work at any time in the last 12 months, was your wheezing or whistling: worse, better, or unchanged?

- Worse
- Better
- Unchanged

5.5 After returning to your work at any time in the last 12 months, was your wheezing or whistling: worse, better, or unchanged?

- Worse
- Better
- Unchanged

5.6 If you were away from work for 5 or more consecutive days of absence at any time in the last 12 months, was your wheezing or whistling: worse, better, or unchanged?

- Worse
- Better
- Unchanged
- Not Applicable

5.7 When you returned to your work after 5 or more consecutive days of absence at any time in the last 12 months, was your wheezing or whistling: worse, better, or unchanged?

- Worse
- Better
- Unchanged
- Not Applicable

5.8 Have you had to miss days of work due to wheezing or whistling at any time in the last 12 months?

- Yes
- No → Go to Question 6 on Page 4

5.8.1 If YES, how many days of work did you miss in the last 12 months? (Enter approximate number of days)

|  |  |  |      |
|--|--|--|------|
|  |  |  | DAYS |
|--|--|--|------|

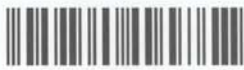

6. Have you had an attack/episode of shortness of breath at any time in the last 12 months? (Mark an X for the single best answer)

- Yes
- No → Go to Question 7
- Don't Know → Go to Question 7

6.1 Have you had an attack/episode of shortness of breath that came on following strenuous activity at any time in the last 12 months?

- Yes
- No

6.2 Have you had an attack/episode of shortness of breath while you were at home (indoors or outdoors) at any time in the last 12 months?

- Yes
- No

6.3 Have you had an attack/episode of shortness of breath while you were at work at any time in the last 12 months?

- Yes
- No

6.4 While you were away from work at any time in the last 12 months, was your shortness of breath: worse, better, or unchanged?

- Worse
- Better
- Unchanged

6.5 After returning to your work at any time in the last 12 months, was your shortness of breath: worse, better, or unchanged?

- Worse
- Better
- Unchanged

6.6 If you were away from work for 5 or more consecutive days of absence at any time in the last 12 months, was your shortness of breath: worse, better, or unchanged?

- Worse
- Better
- Unchanged
- Not Applicable

6.7 When you returned to your work after 5 or more consecutive days of absence at any time in the last 12 months, was your shortness of breath: worse, better, or unchanged?

- Worse
- Better
- Unchanged
- Not Applicable

6.8 Have you had to miss days of work due to shortness of breath in the last 12 months?

- Yes
- No → Go to Question 7

6.8.1 If YES, how many days of work did you miss in the last 12 months? (Enter approximate number of days)

DAYS

7. Have you been awakened during the night by an attack/episode of any of the following symptoms in the last 12 months? (Indicate YES or NO for each symptom)

- | Yes                      | No                       |                     |
|--------------------------|--------------------------|---------------------|
| <input type="checkbox"/> | <input type="checkbox"/> | Cough               |
| <input type="checkbox"/> | <input type="checkbox"/> | Shortness of breath |
| <input type="checkbox"/> | <input type="checkbox"/> | Chest tightness     |

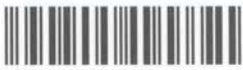

## Pets, Animals, Allergies

Questions 8 to 13 ask you about pets, animals, allergies and family medical history.

8. Do you currently have any of the following pets in your home? (*Indicate Yes or No for each*)
- | Yes                      | No                       |           |
|--------------------------|--------------------------|-----------|
| <input type="checkbox"/> | <input type="checkbox"/> | Dog       |
| <input type="checkbox"/> | <input type="checkbox"/> | Cat       |
| <input type="checkbox"/> | <input type="checkbox"/> | Other pet |
9. Have you ever lived with any of the following pets in your home? (*Indicate Yes or No for each*)
- | Yes                      | No                       |           |
|--------------------------|--------------------------|-----------|
| <input type="checkbox"/> | <input type="checkbox"/> | Dog       |
| <input type="checkbox"/> | <input type="checkbox"/> | Cat       |
| <input type="checkbox"/> | <input type="checkbox"/> | Other pet |
10. Have you ever had any of the following medical conditions? (*Indicate Yes or No for each*)
- | Yes                      | No                       |                                                                                             |
|--------------------------|--------------------------|---------------------------------------------------------------------------------------------|
| <input type="checkbox"/> | <input type="checkbox"/> | Nasal or sinus allergies, including hay fever                                               |
| <input type="checkbox"/> | <input type="checkbox"/> | Eczema or any kind of skin allergy                                                          |
| <input type="checkbox"/> | <input type="checkbox"/> | Frequent heartburn                                                                          |
| <input type="checkbox"/> | <input type="checkbox"/> | More than 6 respiratory infections in one year                                              |
| <input type="checkbox"/> | <input type="checkbox"/> | Allergies to chemicals                                                                      |
| <input type="checkbox"/> | <input type="checkbox"/> | Allergies to medicines                                                                      |
| <input type="checkbox"/> | <input type="checkbox"/> | Allergies to animals                                                                        |
| <input type="checkbox"/> | <input type="checkbox"/> | Allergies to dust or dust mite                                                              |
| <input type="checkbox"/> | <input type="checkbox"/> | Allergies to latex or latex-containing products (ace bandages/adhesive tape/condoms/gloves) |
11. When you are near animals (cats/dogs/horses), feathers (pillows/quilts/duvets), or in a dusty part of the house, do you ever:
- | Yes                      | No                       |                                           |
|--------------------------|--------------------------|-------------------------------------------|
| <input type="checkbox"/> | <input type="checkbox"/> | Get itchy or watery eyes?                 |
| <input type="checkbox"/> | <input type="checkbox"/> | Get a feeling of tightness in your chest? |
12. When you are near trees, grass, or flowers, or when there is a lot of pollen around, do you ever:
- | Yes                      | No                       |                           |
|--------------------------|--------------------------|---------------------------|
| <input type="checkbox"/> | <input type="checkbox"/> | Get itchy or watery eyes? |
13. Have any of your immediate family members (parents/siblings/children) had any of the following medical conditions? (*Indicate Yes, No or Don't Know for each condition*)
- | Yes                      | No                       | Don't Know               |                                      |
|--------------------------|--------------------------|--------------------------|--------------------------------------|
| <input type="checkbox"/> | <input type="checkbox"/> | <input type="checkbox"/> | Asthma                               |
| <input type="checkbox"/> | <input type="checkbox"/> | <input type="checkbox"/> | Hay fever, eczema, or skin allergies |

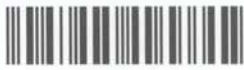

## House or Apartment

Questions 14 and 15 ask you to describe the house or apartment you are currently living in.

14. In your house or apartment do you use any of the following: *(Indicate Yes or No for each item)*

Yes    No

- |                          |                          |                                            |
|--------------------------|--------------------------|--------------------------------------------|
| <input type="checkbox"/> | <input type="checkbox"/> | Gas for cooking or heating?                |
| <input type="checkbox"/> | <input type="checkbox"/> | Fireplace?                                 |
| <input type="checkbox"/> | <input type="checkbox"/> | Air-conditioning (central or window unit)? |

15. Does your house or apartment have any of the following characteristics: *(Indicate Yes or No for each characteristic)*

Yes    No    Don't  
Know

- |                          |                          |                          |                                                                         |
|--------------------------|--------------------------|--------------------------|-------------------------------------------------------------------------|
| <input type="checkbox"/> | <input type="checkbox"/> | <input type="checkbox"/> | Are there drapes or curtains in any room in your house or apartment?    |
| <input type="checkbox"/> | <input type="checkbox"/> | <input type="checkbox"/> | Is there wall-to-wall carpeting in any room in your house or apartment? |
| <input type="checkbox"/> | <input type="checkbox"/> | <input type="checkbox"/> | Is your home sprayed for pest control at least every 3 months?          |
| <input type="checkbox"/> | <input type="checkbox"/> | <input type="checkbox"/> | Are there large visible areas of mold, mildew, or recent water damage?  |
| <input type="checkbox"/> | <input type="checkbox"/> | <input type="checkbox"/> | Was your house or apartment originally built before 1973?               |

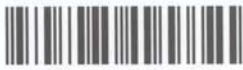

## Occupational History

Questions 16 to 22 ask you about your **CURRENT** or **MOST RECENT** Job.

16. In which month and year did you begin your current or most recent job?

 / 

Month Year

17. In which month and year did you stop working at this job?

 / 

Month Year

Not Applicable

18. How many hours per week did/do you usually work on this job, including overtime?

 HOURS

19. During this time, were/are you a student in this job? (Mark an X for the single best answer)

- Yes  
 No

20. What kind of business or industry is/was this? (Mark an X for the single best answer)

- Hospital  Research  
 Private practice  Medical sales  
 Outpatient clinic  Academia  
 Nursing home  Home health  
 Health department  Dental office  
 Public school  Other (specify):  
 Health insurance agency

↓

21. What is/was your job title? (Mark an X for the single best answer)

- LVN  Respiratory therapist  
 RN  Occupational therapist  
 Nurse practitioner  Physical therapist  
 Physician  Physician's assistant  
 Dentist  Dental hygienist  
 Dental assistant  Nurse aid  
 Allied health professional  Other (specify):

↓

22. While working at this job, indicate how often, on average, you handled or were exposed to any of the following products? (Mark an X for the single best answer for each item)

|                          | More than once a day     | Every day                | At least once a week     | At least once a month    | Never                    |
|--------------------------|--------------------------|--------------------------|--------------------------|--------------------------|--------------------------|
| Disinfectants/sterilants | <input type="checkbox"/> |
| Cleaning agents          | <input type="checkbox"/> |
| Latex gloves/products    | <input type="checkbox"/> |
| Aerosolized medications  | <input type="checkbox"/> |
| Adhesives/removers/glues | <input type="checkbox"/> |
| Gases/vapors             | <input type="checkbox"/> |



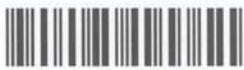

## Occupational History (continued)

Questions 23 to 30 ask you about your **LONGEST HELD** Job.

23. Is your current or most recent job also your longest held job?  Yes → Go to Question 31 on Page 9  
 No

24. In which month and year did you begin your longest held job?

|  |  |  |  |  |  |
|--|--|--|--|--|--|
|  |  |  |  |  |  |
|--|--|--|--|--|--|

Month                  Year

25. In which month and year did you stop working at this job?

|  |  |  |  |  |  |
|--|--|--|--|--|--|
|  |  |  |  |  |  |
|--|--|--|--|--|--|

Month                  Year

26. How many hours per week did you usually work on this job, including overtime?

|  |  |  |  |
|--|--|--|--|
|  |  |  |  |
|--|--|--|--|

 HOURS

27. During this time, were you a student in this job? (Mark an X for the single best answer)

- Yes  
 No

28. What kind of business or industry was this? (Mark an X for the single best answer)

- |                                                  |                                           |
|--------------------------------------------------|-------------------------------------------|
| <input type="checkbox"/> Hospital                | <input type="checkbox"/> Research         |
| <input type="checkbox"/> Private practice        | <input type="checkbox"/> Medical sales    |
| <input type="checkbox"/> Outpatient clinic       | <input type="checkbox"/> Academia         |
| <input type="checkbox"/> Nursing home            | <input type="checkbox"/> Home health      |
| <input type="checkbox"/> Health department       | <input type="checkbox"/> Dental office    |
| <input type="checkbox"/> Public school           | <input type="checkbox"/> Other (specify): |
| <input type="checkbox"/> Health insurance agency |                                           |

|  |  |  |  |  |  |  |  |  |  |  |  |
|--|--|--|--|--|--|--|--|--|--|--|--|
|  |  |  |  |  |  |  |  |  |  |  |  |
|--|--|--|--|--|--|--|--|--|--|--|--|

29. What was your job title? (Mark an X for the single best answer)

- |                                                     |                                                 |
|-----------------------------------------------------|-------------------------------------------------|
| <input type="checkbox"/> LVN                        | <input type="checkbox"/> Respiratory therapist  |
| <input type="checkbox"/> RN                         | <input type="checkbox"/> Occupational therapist |
| <input type="checkbox"/> Nurse practitioner         | <input type="checkbox"/> Physical therapist     |
| <input type="checkbox"/> Physician                  | <input type="checkbox"/> Physician's assistant  |
| <input type="checkbox"/> Dentist                    | <input type="checkbox"/> Dental hygienist       |
| <input type="checkbox"/> Dental assistant           | <input type="checkbox"/> Nurse aid              |
| <input type="checkbox"/> Allied health professional | <input type="checkbox"/> Other (specify):       |

|  |  |  |  |  |  |  |  |  |  |  |  |
|--|--|--|--|--|--|--|--|--|--|--|--|
|  |  |  |  |  |  |  |  |  |  |  |  |
|--|--|--|--|--|--|--|--|--|--|--|--|

30. While working at this job, indicate how often, on average, you handled or were exposed to any of the following products? (Mark an X for the single best answer for each item)

|                             | More than once a day     | Every day                | At least once a week     | At least once a month    | Never                    |
|-----------------------------|--------------------------|--------------------------|--------------------------|--------------------------|--------------------------|
| a. Disinfectants/sterilants | <input type="checkbox"/> |
| b. Cleaning agents          | <input type="checkbox"/> |
| c. Latex gloves/products    | <input type="checkbox"/> |
| d. Aerosolized medications  | <input type="checkbox"/> |
| e. Adhesives/removers/glues | <input type="checkbox"/> |
| f. Gases/vapors             | <input type="checkbox"/> |

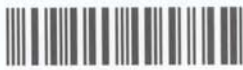

## Accidental Chemical Spill or Gas Release

Question 31 asks you about exposure to an accidental chemical spill or gas release.

31. Were you ever involved in an accidental chemical spill or gas release? (Mark an X for the single best answer)

- Yes  
 No → Go to Question 32 on Page 10  
 Don't Know → Go to Question 32 on Page 10

31.1 Did this accidental chemical spill or gas release occur at work? (Mark an X for the single best answer)

- Yes  
 No

31.2 When did this accidental chemical spill or gas release occur?

|       |  |  |  |      |  |  |  |  |  |
|-------|--|--|--|------|--|--|--|--|--|
|       |  |  |  |      |  |  |  |  |  |
| Month |  |  |  | Year |  |  |  |  |  |

31.3 What were you exposed to? (Please be as specific as possible)

|  |  |  |  |  |  |  |  |  |  |  |  |  |  |  |  |  |  |  |  |
|--|--|--|--|--|--|--|--|--|--|--|--|--|--|--|--|--|--|--|--|
|  |  |  |  |  |  |  |  |  |  |  |  |  |  |  |  |  |  |  |  |
|--|--|--|--|--|--|--|--|--|--|--|--|--|--|--|--|--|--|--|--|

31.4 How were you exposed? (Indicate Yes or No for each route of exposure)

- | Yes                      | No                       |                                  |
|--------------------------|--------------------------|----------------------------------|
| <input type="checkbox"/> | <input type="checkbox"/> | Breathing                        |
| <input type="checkbox"/> | <input type="checkbox"/> | Through direct contact with skin |
| <input type="checkbox"/> | <input type="checkbox"/> | Swallowing/ingestion             |

31.5 During this accidental chemical spill or gas release, how long were you exposed? (Mark an X for the single best answer)

- Less than 1 hour  
 1 to 8 hours  
 9 to 24 hours  
 More than 24 hours  
 Don't Know/Don't Remember

31.6 Did you have to receive medical attention because of this accident/exposure? (Mark an X for the single best answer)

- Yes  
 No  
 Don't Know/Don't Remember

31.7 In the first 24 hours following this accident/exposure, did you experience any of the following symptoms: (Indicate Yes or No for each symptom)

- | Yes                      | No                       |                          |
|--------------------------|--------------------------|--------------------------|
| <input type="checkbox"/> | <input type="checkbox"/> | Shortness of breath?     |
| <input type="checkbox"/> | <input type="checkbox"/> | Wheezing?                |
| <input type="checkbox"/> | <input type="checkbox"/> | Cough?                   |
| <input type="checkbox"/> | <input type="checkbox"/> | Tightness in your chest? |

If you answered **YES** to **ANY** symptoms in Q31.7, continue answering the questions on this page.

If you answered **NO** to **ALL** items in Q31.7, Go to Question 32 on Page 10.

31.7.1 How soon after the accident/exposure did these symptoms occur?

- Less than 1 hour  
 1 to 24 hours  
 25 hours to 1 week  
 More than 1 week  
 Don't Know/Don't Remember

31.7.2 How long did these symptoms last?

- Less than 1 week  
 1 week to 1 month  
 More than 1 month to 3 months  
 More than 3 months  
 Don't Know/Don't Remember

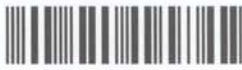

## Jobs

Question 32 asks you about jobs that you have EVER had.

32. Think about all of the **jobs** you have ever had. To the best of your knowledge have you ever been in contact with any of the following materials at least once a month for a period of 6 months or longer? (Indicate Yes or No for each one)

Yes No

- Bleach
- Cleaners for room and counter tops
- Cleaners/abrasives
- Cleaners for restrooms and toilets
- Detergents
- Disinfectants

Yes No

- Cidex™ (glutaraldehyde)
- Cidex OPA™ (ortho-phtaldehyde)
- Chloramines
- Adhesives or glues

Yes No

- Ammonia
- Pesticides
- Paints (acrylics, stains/varnishes)
- Tobacco smoke (including passive)
- Solvents like toluene, xylene, benzene, hexane, mineral spirits, paint thinners
- Toner for copiers or printers

Yes No

- Anesthetics
- Antibiotics
- Antiseptics
- Bronchodilators
- Iodine (Povidone iodine, Betadine™)
- Nebulized drugs (like pentamidine or ribavirin)
- Talc

Yes No

- Acetaldehyde
- Alkalis
- Ethylene oxide
- Formalin/formaldehyde
- Nitric oxide

## Hobbies

Question 33 asks you about hobbies that you have EVER had.

33. Have you ever been regularly involved in any of the following **hobbies** or activities for a period of 3 months or longer? (Indicate Yes or No for each one)

Yes No

- Refinishing furniture
- Auto repair
- Building radios or other electronic equipment
- Metal work including soldering metal (such as jewelry making)
- Painting with acrylics or oil paints
- Gardening/Farming
- Sculpting
- Woodworking
- Hobbies involving use of glues or adhesives
- Other hobbies/activities (Please specify):

|  |  |  |  |  |  |  |  |  |  |  |  |  |  |  |  |  |  |  |  |
|--|--|--|--|--|--|--|--|--|--|--|--|--|--|--|--|--|--|--|--|
|  |  |  |  |  |  |  |  |  |  |  |  |  |  |  |  |  |  |  |  |
|--|--|--|--|--|--|--|--|--|--|--|--|--|--|--|--|--|--|--|--|

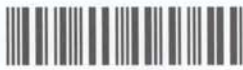

## Demographics

34. What is your date of birth?

/ / 

Month      Day      Year

35. What is your gender?

- Male  
 Female

36. Do you consider yourself Spanish/Hispanic/Latino?  
(Mark an X for the single best answer)

- No, not Spanish/Hispanic/Latino  
 Yes, Mexican, Mexican American, Chicano  
 Yes, Puerto Rican  
 Yes, Cuban  
 Yes, other Spanish/Hispanic/Latino (specify):

37. What is your race? (Mark an X for the single best answer)

- White  
 Black  
 Asian, Asian-American or Pacific Islander  
 American Indian or Alaska Native  
 Another race (specify):

38. What is your standing height?

/ 

Feet      Inches

39. How much do you weigh?

Pounds

40. What is the highest grade or level of education that you have completed? (Mark an X for the single best answer)

- High school graduate or GED  
 Some college or vocational/technical training  
 4 year college graduate (Bachelor's Degree)  
 Graduate/Medical/Law school

41. How many years have you worked as a health care professional (include years as a healthcare student)?

 YEARS

42. Have you smoked at least 100 cigarettes during your life?

- Yes  
 No

43. Do you smoke cigarettes now?

- Yes → Go to Question 43.1  
 No

43.1 If YES, how many cigarettes do you smoke per day?

- less than 1/2 pack a day  
 1/2 to 1 pack a day  
 >1 to 2 packs a day  
 >2 to 3 packs a day  
 more than 3 packs a day

*Thank you for completing this survey.*

Please return this survey in the envelope provided to:

PO Box 20186

Houston, TX 77225-0186

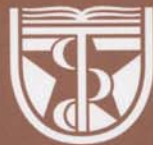

THE UNIVERSITY *of* TEXAS  
HEALTH SCIENCE CENTER AT HOUSTON

SCHOOL OF PUBLIC HEALTH

Thank you for completing  
A Survey of Asthma in Health Professionals  
Please return this survey in the envelope provided to:  
PO Box 20186  
Houston, TX 77225 - 0186
